# Supplementary material for: Human Holliday junction resolvase GEN1 uses a chromodomain for efficient DNA recognition and cleavage
Source: eLife. 2015 Dec 18;4:e12256. doi: 10.7554/eLife.12256 (PMC5039027; doi:10.7554/eLife.12256)
Supplement: Figure 5—source data 3. — DOI: http://dx.doi.org/10.7554/eLife.12256.016 [file elife-12256-fig5-data3.xlsx]

## Sheet: Sheet1
In vitro activity measurements of different GEN12-505 variants.
HJ substrate											5'Flap substrate
WT											WT
c (nM)	#1	#2	#3	#4	mean	std	%	std%			c (nM)	#1	#2	#3	mean	std	%	std%
0	0	0	0	0	0	0	0	0			0	0	0	0	0	0	0	0
8	0.0887482	0.11238	0.241602	0.122955	0.141421	0.0683011	14.1421	6.83011			0.5	0.293231	0.329305	0.412849	0.345128	0.061359	34.5128	6.1359
16	0.113309	0.100429	0.379052	0.273403	0.216548	0.133893	21.6548	13.3893			1	0.53767	0.506731	0.738571	0.594324	0.125876	59.4324	12.5876
32	0.314453	0.463729	0.505614	0.595542	0.469835	0.117279	46.9835	11.7279			2	0.950424	0.850641	0.932232	0.911099	0.0531425	91.1099	5.31425
64	0.901233	0.829083	0.838524	0.916474	0.871329	0.0439441	87.1329	4.39441			4	0.984211	0.978747	0.989351	0.984103	0.00530274	98.4103	0.530274
128	0.963664	0.97705	0.965093	0.983565	0.972343	0.00959139	97.2343	0.959139			8	1	1	0.988374	0.996125	0.00671239	99.6125	0.671239
256	0.988077	0.9827	0.963178	0.992185	0.981535	0.0128399	98.1535	1.28399			16	1	1	1	1	0	100	0
D30N											D30N
c (nM)	#1	#2	#3	mean	std	%	std%				c (nM)	#1	#2	#3	mean	std	%	std%
0	0	0	0	0	0	0	0				0	0	0	0	0	0	0	0
8	0.0692877	0.0378258	0.0663956	0.0578364	0.0173899	5.78364	1.73899				0.5	-0.0282381	-0.00332216	0.0441462	0.00419529	0.036773	0.419529	3.6773
16	0.0456894	0.0436566	0.0758455	0.0550638	0.0180261	5.50638	1.80261				1	-0.0282381	0.000707296	0.0829461	0.0184718	0.0576816	1.84718	5.76816
32	0.0430755	0.0404997	0.0680102	0.0505285	0.0151943	5.05285	1.51943				2	0.0176261	0.0223296	0.0917526	0.0439028	0.0415059	4.39028	4.15059
64	0.00682599	-0.0270854	-0.0138067	-0.0113554	0.0170881	-1.13554	1.70881				4	-0.0150815	0.0942061	0.148696	0.0759403	0.0834028	7.59403	8.34028
128	0.0598134	-0.00265199	-0.0424221	0.00491311	0.0515359	0.491311	5.15359				8	-0.0326321	0.0803739	0.1018	0.0498471	0.072228	4.98471	7.2228
256	0.081798	-0.0159924	0.0560836	0.0406297	0.0506938	4.06297	5.06938				16	-0.124322	0.0698852	0.0667617	0.0041083	0.111235	0.41083	11.1235
C36E											C36E
c (nM)	#1	#2	#3	mean	std	%	std%				c (nM)	#1	#2	#3	mean	std	%	std%
0	0	0	0	0	0	0	0				0	0	0	0	0	0	0	0
8	0.0205309	0.0552283	-0.0491136	0.00888186	0.0531374	0.888186	5.31374				0.5	0.031467	-0.00488945	-0.0459431	-0.00645519	0.0387288	-0.645519	3.87288
16	0.017094	0.0332369	-0.0477854	0.000848468	0.0428846	0.0848468	4.28846				1	0.0531995	-0.0221623	-0.0281793	0.000952617	0.045347	0.0952617	4.5347
32	0.00260278	0.0250079	-0.0530072	-0.00846551	0.040168	-0.846551	4.0168				2	0.0228471	-0.00137959	-0.0295804	-0.00270429	0.0262389	-0.270429	2.62389
64	-0.0939283	-0.0361334	0.0180667	-0.0373317	0.0560071	-3.73317	5.60071				4	0.187441	-0.0397861	0.0397818	0.0624791	0.115302	6.24791	11.5302
128	-0.0685662	-0.0625403	-0.0113026	-0.0474697	0.0314662	-4.74697	3.14662				8	0.148062	-0.0497111	0.102203	0.0668513	0.103517	6.68513	10.3517
256	0.0179345	0.0129132	-0.0022915	0.00951873	0.0105316	0.951873	1.05316				16	0.109188	-0.210769	0.224805	0.0410745	0.225634	4.10745	22.5634
R54E											R54E
c (nM)	#1	#2	#3	mean	std	%	std%				c (nM)	#1	#2	#3	mean	std	%	std%
0	0	0	0	0	0	0	0				0	0	0	0	0	0	0	0
8	0.0239401	0.033902	0.134362	0.0640682	0.06108	6.40682	6.108				0.5	0.0105807	0.0173228	0.121469	0.0497907	0.0621663	4.97907	6.21663
16	0.0193662	0.0906556	0.0907375	0.0669198	0.0411826	6.69198	4.11826				1	0.0872251	0.0106607	0.147253	0.0817128	0.0684626	8.17128	6.84626
32	-0.0091351	0.130719	0.09953	0.0737046	0.0734167	7.37046	7.34167				2	0.0762514	0.111484	0.203465	0.1304	0.0656827	13.04	6.56827
64	0.0156789	0.144238	0.132884	0.0976001	0.0711726	9.76001	7.11726				4	0.178219	0.245697	0.334316	0.252744	0.0782864	25.2744	7.82864
128	0.107657	0.265361	0.332065	0.235027	0.115238	23.5027	11.5238				8	0.363328	0.312279	0.384317	0.353308	0.0370495	35.3308	3.70495
256	0.411287	0.581166	0.593504	0.528652	0.101829	52.8652	10.1829				16	0.569468	0.560233	0.613645	0.581115	0.0285473	58.1115	2.85473
R89E											R89E
c (nM)	#1	#2	#3	mean	std	%	std%				c (nM)	#1	#2	#3	mean	std	%	std%
0	0	0	0	0	0	0	0				0	0	0	0	0	0	0	0
8	0.078071	0.102985	0.118237	0.0997642	0.0202758	9.97642	2.02758				0.5	0.175956	0.0777643	0.18293	0.14555	0.0588077	14.555	5.88077
16	0.163894	0.0868211	0.242046	0.164254	0.0776129	16.4254	7.76129				1	0.29443	0.114131	0.24321	0.217257	0.0929094	21.7257	9.29094
32	0.396471	0.366958	0.419302	0.394244	0.0262431	39.4244	2.62431				2	0.551731	0.311699	0.42929	0.430907	0.120024	43.0907	12.0024
64	0.681514	0.868924	0.72735	0.759263	0.0976958	75.9263	9.76958				4	0.95879	0.574584	0.759327	0.764234	0.19215	76.4234	19.215
128	0.902382	0.980244	0.949827	0.944151	0.0392404	94.4151	3.92404				8	0.981613	0.914234	0.969912	0.955253	0.0360021	95.5253	3.60021
256	0.938191	0.988896	0.957836	0.961641	0.0255661	96.1641	2.55661				16	0.98414	1	0.983076	0.989072	0.00947874	98.9072	0.947874
R93E											R93E
c (nM)	#1	#2	#3	mean%	std%						c (nM)	#1	#2	#3	mean%	std%
0	0	0	0	0	0						0	0	0	0	0	0
8	15.7576	21.6723	18.139	18.5229	2.97598						0.5	14.7569	34.0133	28.0261	25.5988	9.855
16	16.5739	35.8358	34.3635	28.9244	10.7211						1	19.5182	64.7399	48.1088	44.1223	22.8729
32	35.4783	53.4178	43.2564	44.0508	8.99611						2	46.2071	90.6224	86.7335	74.521	24.5975
64	57.0377	83.3625	79.3254	73.2419	14.1776						4	83.3256	96.8917	94.6596	91.6256	7.27416
128	90.2299	95.7904	95.5388	93.853	3.14026						8	92.9618	98.1323	98.1692	96.4211	2.99592
256	93.8925	96.1876	96.6737	95.5846	1.48541						16	95.3228	99.3491	100	98.224	2.53345
H109E											H109E
c (nM)	#1	#2	#3	#4	mean%	std%					c (nM)	#1	#2	#3	mean%	std%
0	0	0	0	0	0	0					0	0	0	0	0	0
8	4.53486	8.57313	2.8411	8.20061	6.03742	2.80377					0.5	1.60144	11.4353	14.9666	9.33446	6.92584
16	1.62744	4.87249	4.07949	13.0562	5.9089	4.96103					1	6.9798	16.8108	20.2199	14.6702	6.87472
32	7.89672	15.2239	-0.673256	14.2424	9.17244	7.32324					2	15	44.5336	54.2868	37.9401	20.4565
64	35.4367	37.0474	19.2686	38.9494	32.6755	9.0525					4	49.468	63.1018	88.117	66.8956	19.6018
128	77.3344	86.094	66.9561	79.3423	77.4317	7.92536					8	53.6708	86.9837	95.3298	78.6615	22.0412
256	93.9543	96.9508	93.098	94.7936	94.6992	1.653					16	60.6776	93.4694	96.0411	83.3961	19.7167
F110E											F110E
c (nM)	#1	#2	#3	mean	std	mean%	std%				c (nM)	#1	#2	#3	mean	std	mean%	std%
0	0	0	0	0	0	0	0				0	0	0	0	0	0	0	0
8	0.0500182	0.0884789	0.0933729	0.07729	0.0237445	7.729	2.37445				0.5	0.0224276	0.00604654	0.12596	0.051478	0.0650211	5.1478	6.50211
16	0.0382814	0.0422731	0.110134	0.0635627	0.0403809	6.35627	4.03809				1	0.0589995	0.00952249	0.120855	0.0631257	0.0557808	6.31257	5.57808
32	0.0153954	-0.00516713	0.139059	0.0497625	0.0780138	4.97625	7.80138				2	0.0925077	0.0642492	0.0862961	0.0810177	0.0148503	8.10177	1.48503
64	0.0682972	0.120257	0.227793	0.138782	0.0813458	13.8782	8.13458				4	0.146661	0.126344	0.151027	0.141344	0.0131725	14.1344	1.31725
128	0.465456	0.433949	0.544379	0.481261	0.0568859	48.1261	5.68859				8	0.273009	0.250194	0.271753	0.264985	0.0128251	26.4985	1.28251
256	0.759523	0.675305	0.799316	0.744714	0.063318	74.4714	6.3318				16	0.377909	0.352401	0.329933	0.353414	0.0240041	35.3414	2.40041
T380E											T380E
c (nM)	#1	#2	#3	mean%	std%						c (nM)	#1	#2	#3	mean%	std%
0	0	0	0	0	0						0	0	0	0	0	0
8	10.3556	15.1032	8.4438	11.3009	3.42888						0.5	16.8711	8.93058	12.9074	12.9031	3.97027
16	28.3577	17.0809	5.34163	16.9267	11.5088						1	32.5777	9.52118	9.8384	17.3124	13.221
32	47.3765	43.4561	31.1883	40.6736	8.44519						2	52.5463	35.5887	29.743	39.2927	11.8443
64	80.6131	62.8973	64.0956	69.202	9.90043						4	74.3764	61.1107	51.5804	62.3559	11.4489
128	83.1557	77.1367	83.0856	81.126	3.45502						8	83.249	75.7683	74.5402	77.8525	4.7137
256	69.5993	67.2535	71.5793	69.4773	2.16545						16	89.8807	91.5155	89.446	90.2807	1.0912
R406E											R406E
c (nM)	#1	#2	#3	mean	std	%	std%				c (nM)	#1	#2	#3	mean	std	%	std%
0	0	0	0	0	0	0	0				0	0	0	0	0	0	0	0
8	0.172969	0.231099	0.315171	0.239746	0.071494	23.9746	7.1494				0.5	0.146048	0.0427451	0.11053	0.0997742	0.0524844	9.97742	5.24844
11	0.334902	0.252938	0.348026	0.311955	0.0515298	31.1955	5.15298				1	0.208702	0.156946	0.250148	0.205266	0.0466958	20.5266	4.66958
32	0.472176	0.616824	0.635691	0.574897	0.0894579	57.4897	8.94579				2	0.433501	0.352397	0.567407	0.451102	0.10858	45.1102	10.858
64	0.783574	0.867789	0.896097	0.849153	0.0585305	84.9153	5.85305				4	0.772672	0.771408	0.830174	0.791418	0.0335699	79.1418	3.35699
128	0.958165	0.965054	0.942845	0.955355	0.0113684	95.5355	1.13684				8	0.857002	0.929952	0.934568	0.907174	0.0435119	90.7174	4.35119
256	0.970284	0.952898	0.971451	0.964878	0.0103908	96.4878	1.03908				16	0.96787	0.97514	0.960495	0.967835	0.00732265	96.7835	0.732265
T438E											T438E
c (nM)	#1	#2	#3	mean%	std%						c (nM)	#1	#2	#3	mean%	std%
0	0	0	0	0	0						0	0	0	0	0	0
8	12.3788	11.0088	18.0027	13.7968	3.70629						0.5	14.0028	13.2774	15.5497	14.2766	1.16061
16	18.4139	14.9877	25.8524	19.7513	5.5545						1	28.7259	30.4187	30.2546	29.7997	0.933558
32	49.697	42.3584	42.713	44.9228	4.13838						2	70.3494	66.4285	57.6549	64.8109	6.50001
64	80.8454	67.5704	78.1733	75.5297	7.02125						4	86.9449	88.9079	87.9673	87.9401	0.981786
128	87.6521	91.8884	89.1036	89.548	2.15288						8	92.8375	94.4022	94.335	93.8583	0.884613
256	77.0587	81.1178	76.2493	78.1419	2.60879						16	97.3392	95.8885	95.7852	96.3376	0.868883
G389											G389
c (nM)	#1	#2	#3	#4	mean%	std%					c (nM)	#1	#2	#3	mean%	std%
0	0	0	0	0	0	0					0	0	0	0	0	0
8	14.2051	-13.5699	12.3284	9.02387	5.49689	12.8904					0.5	6.55746	6.79377	7.60005	6.98376	0.546647
16	14.1782	-11.1001	8.81624	10.5893	5.6209	11.3683					1	8.67092	9.36185	10.1209	9.38456	0.725272
32	13.6014	16.6946	7.17595	9.746	11.8045	4.19536					2	13.8404	7.91001	18.6945	13.4817	5.40121
64	18.6641	34.0843	3.15271	14.121	17.5055	12.8278					4	19.0779	11.899	13.7034	14.8934	3.73451
128	43.408	46.3454	3.83	13.321	26.7261	21.3474					8	24.7448	11.1362	13.0891	16.3234	7.35822
256	49.1093	52.479	11.2977	23.5192	34.1013	19.958					16	26.8715	2.90689	12.8088	14.1957	12.0424
