# Supplementary material for: Human Holliday junction resolvase GEN1 uses a chromodomain for efficient DNA recognition and cleavage
Source: eLife journal article supplement (doi:10.7554/elife.12256), 2015-12-18
Supplement: supp [file elife-12256-supp-v1.zip]

[illegible]
