# Supplementary figures and images for: Human Holliday junction resolvase GEN1 uses a chromodomain for efficient DNA recognition and cleavage
Source: eLife journal article supplement (doi:10.7554/elife.12256), 2015-12-18

**Mix 1**

**Mix 2**

**Mix 3**

**I C E**

**I C E**

**I C E**

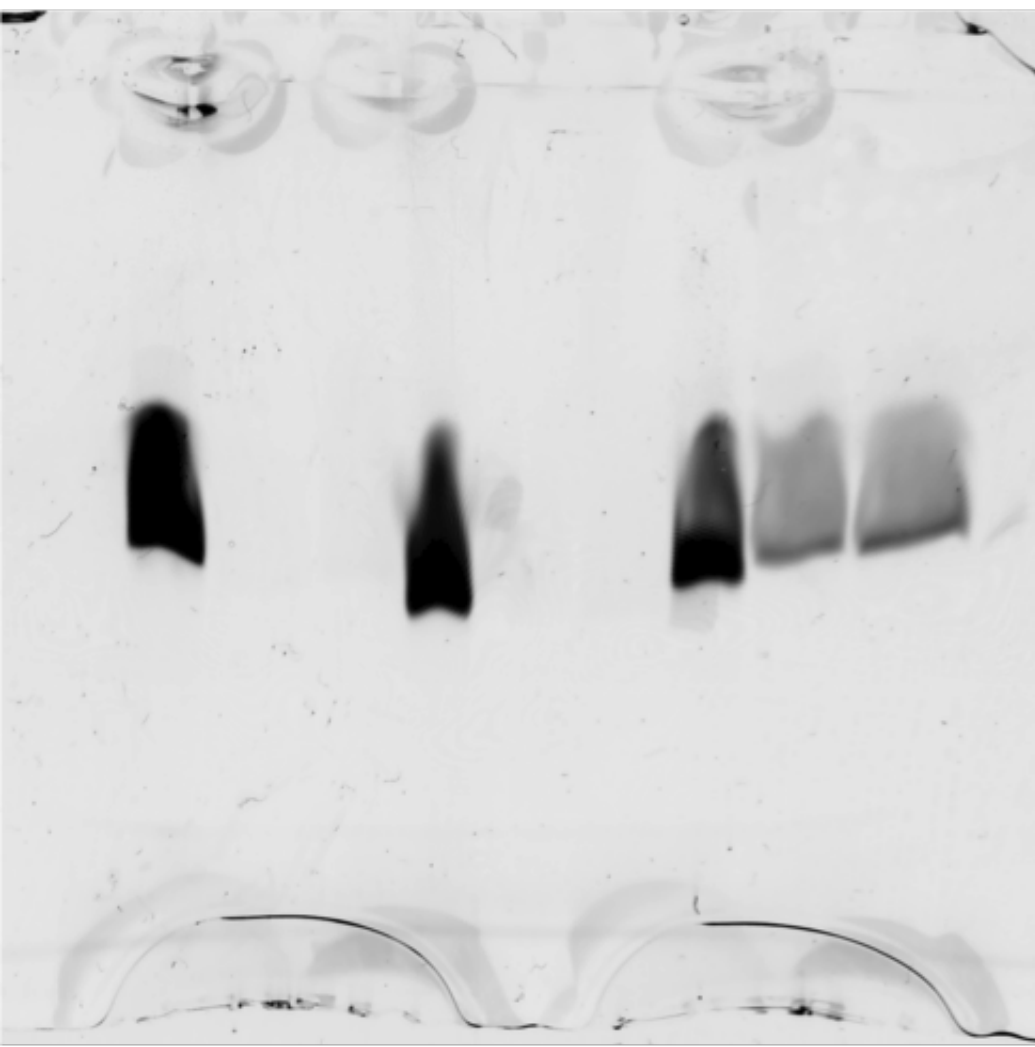

Supplement: supp [file elife-12256-supp-v1.zip]

**A****GEN1  
construct****HJ****5'flap**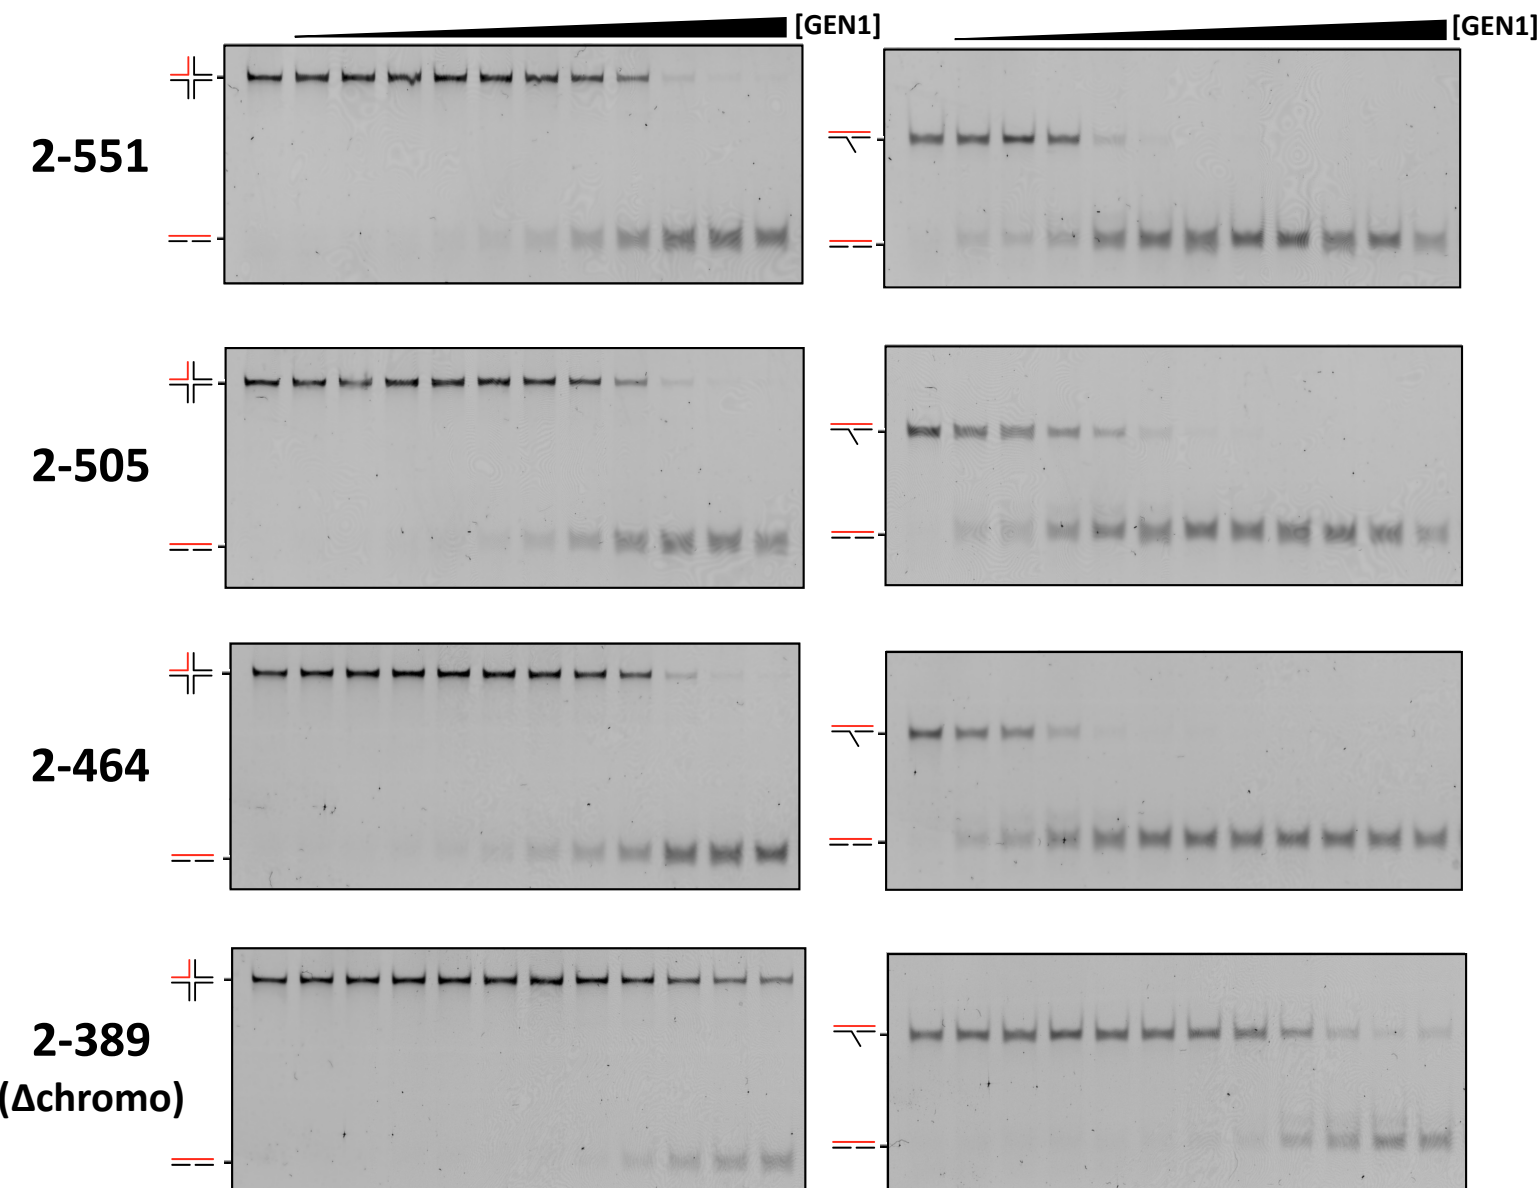**B**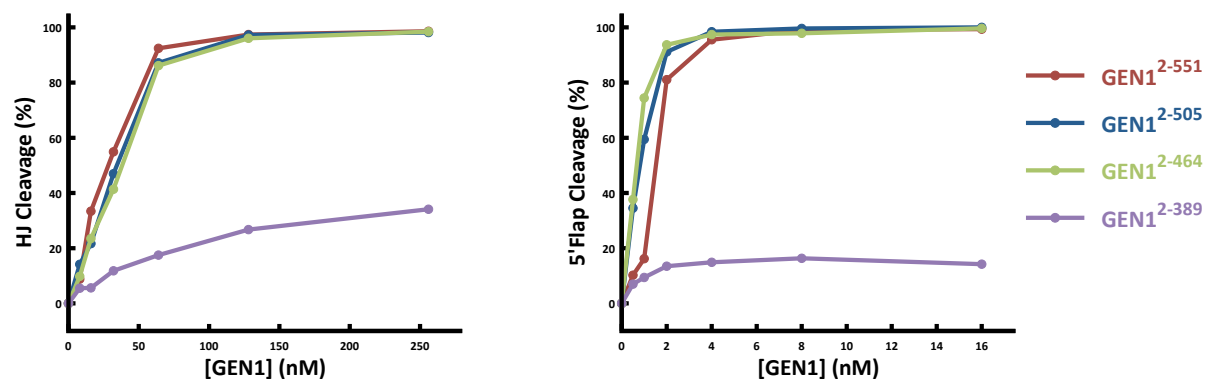

Supplement: supp [file elife-12256-supp-v1.zip]

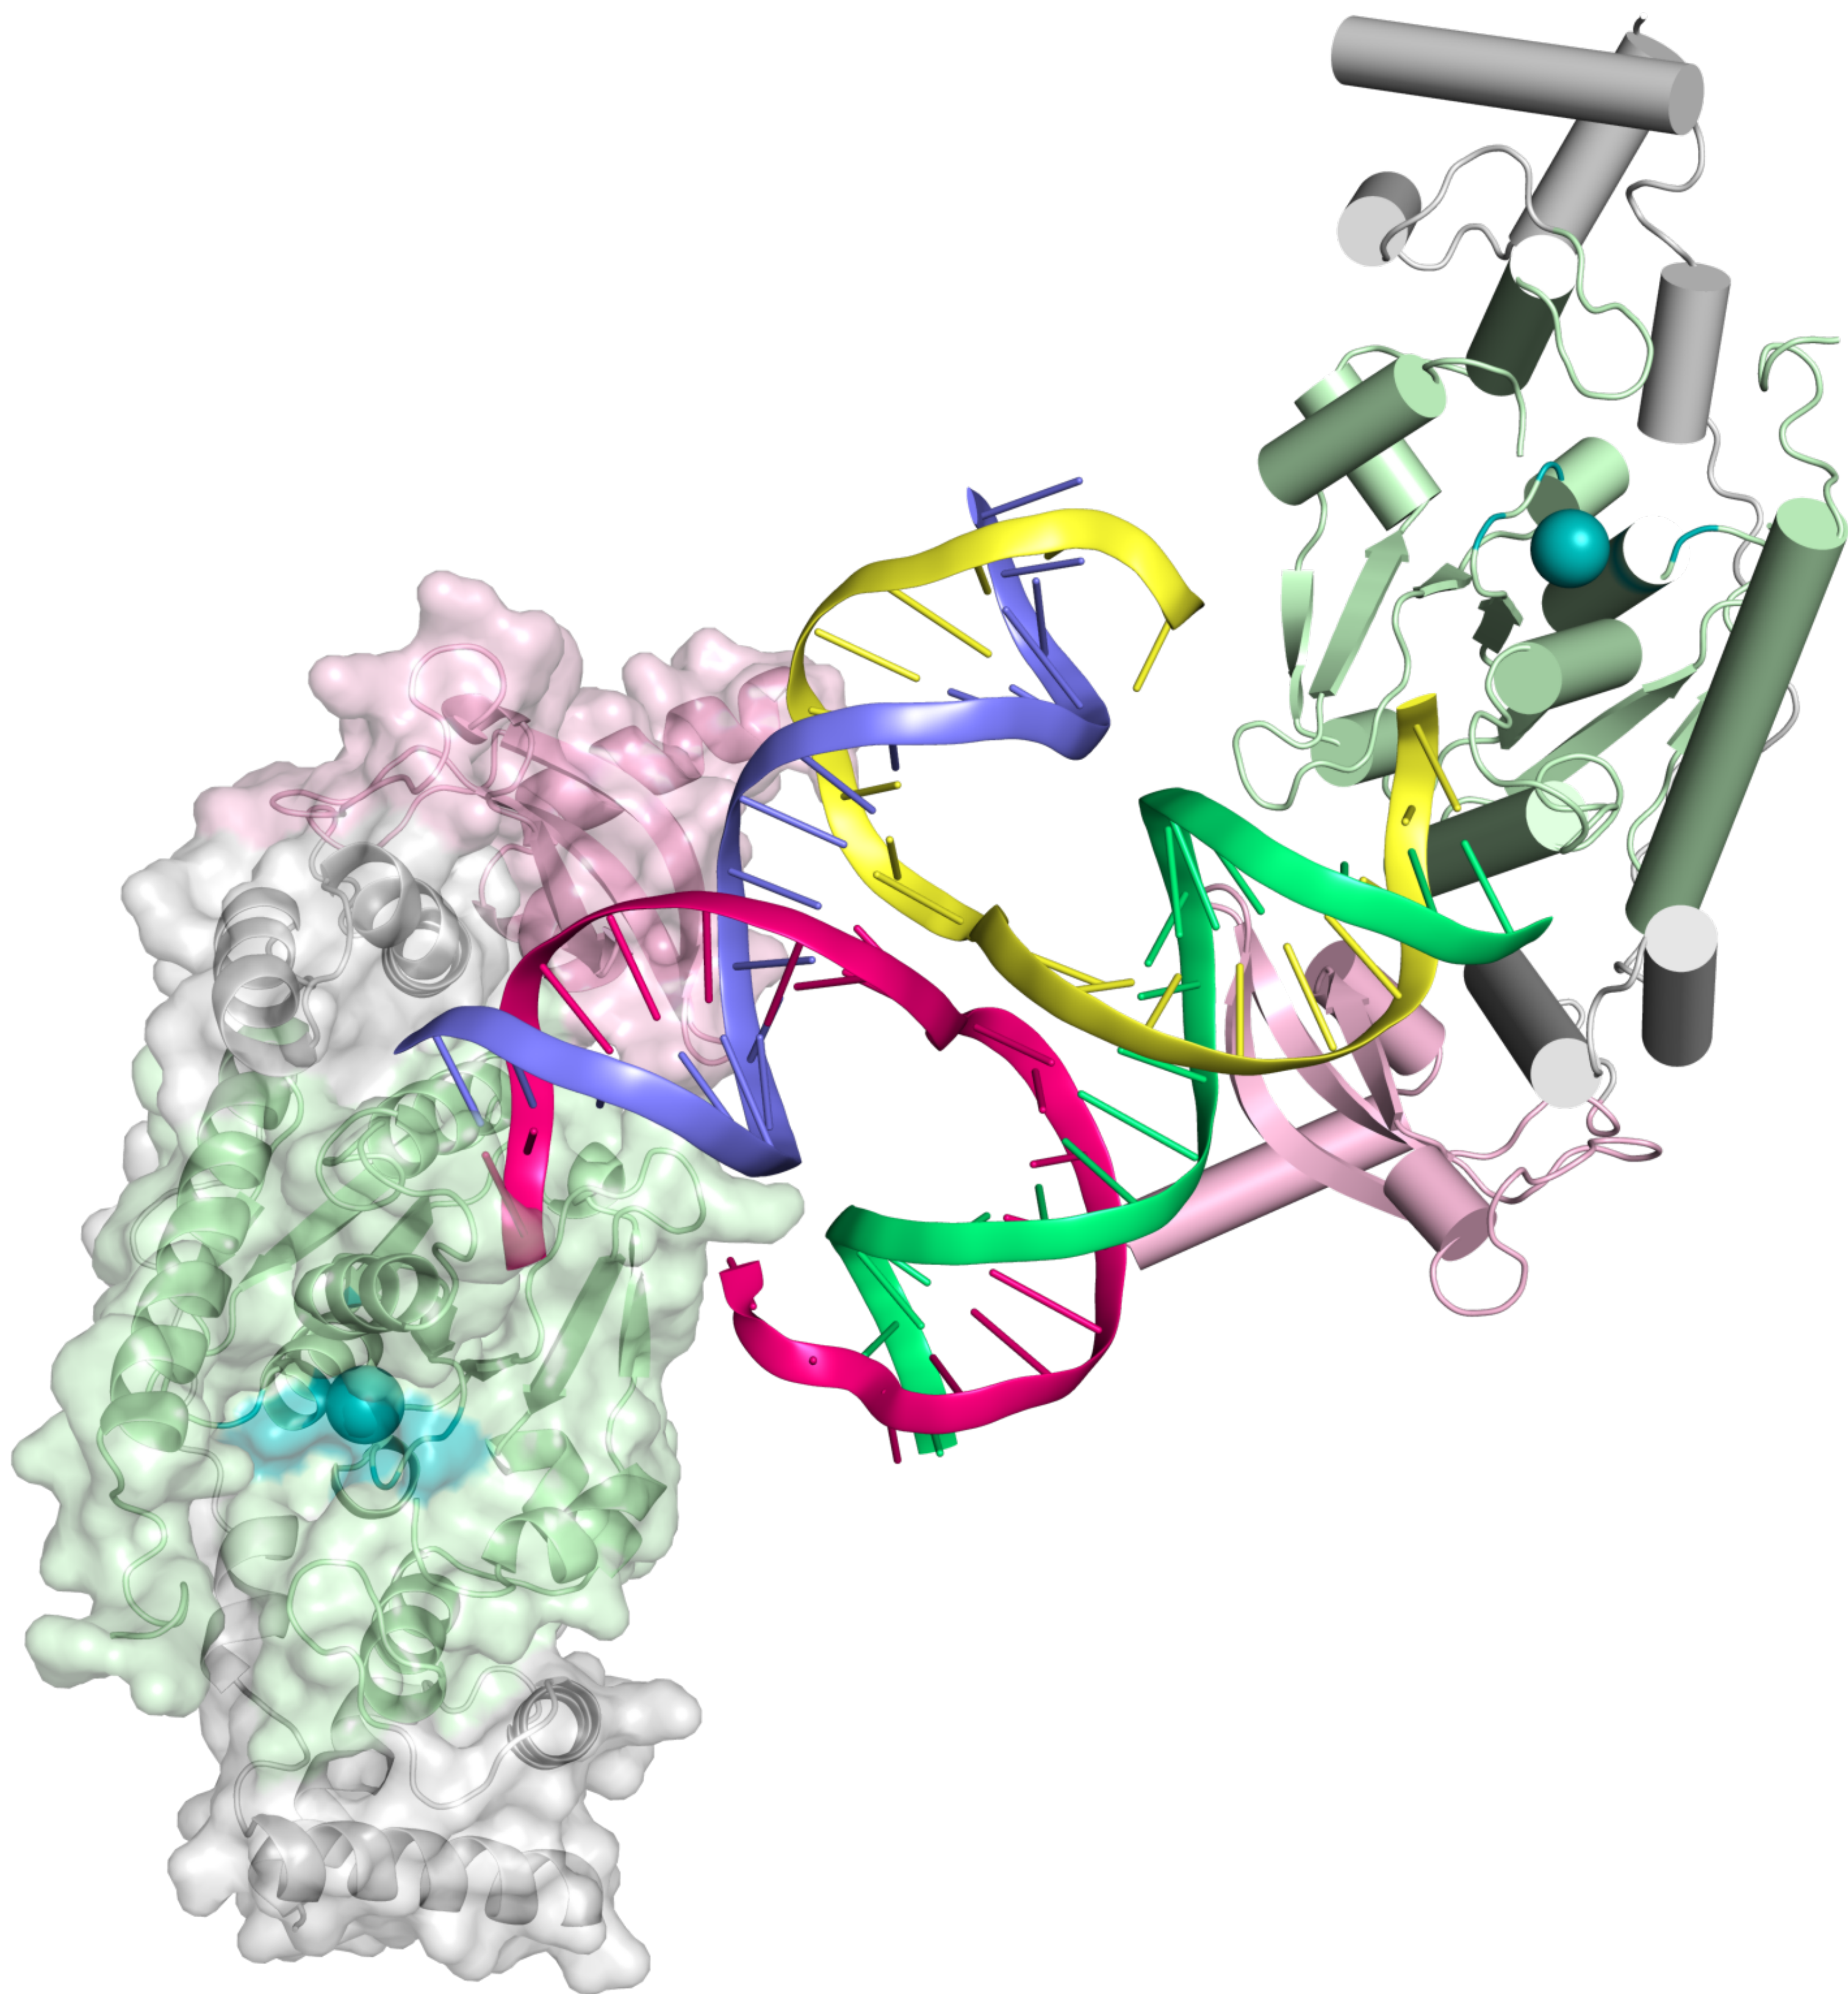

Supplement: supp [file elife-12256-supp-v1.zip]

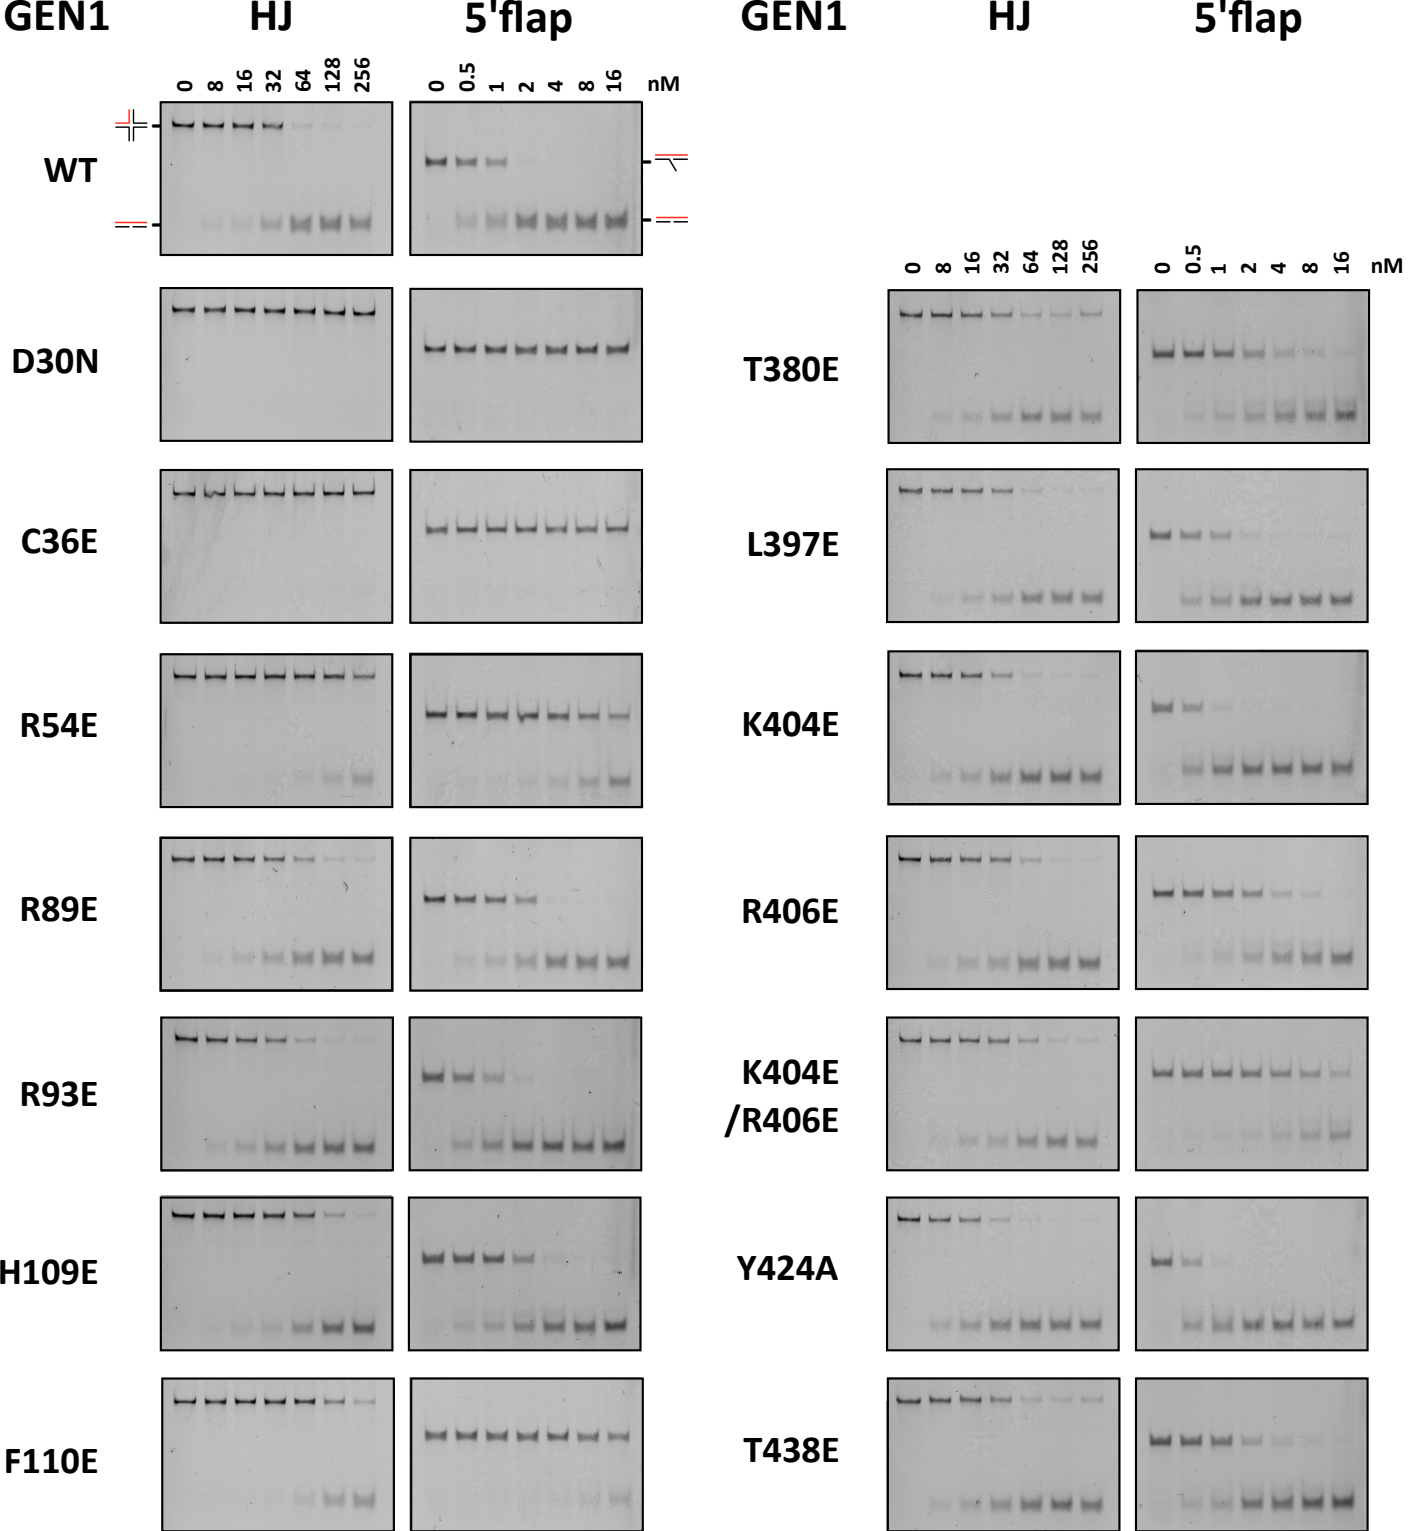

Supplement: supp [file elife-12256-supp-v1.zip]

**A**

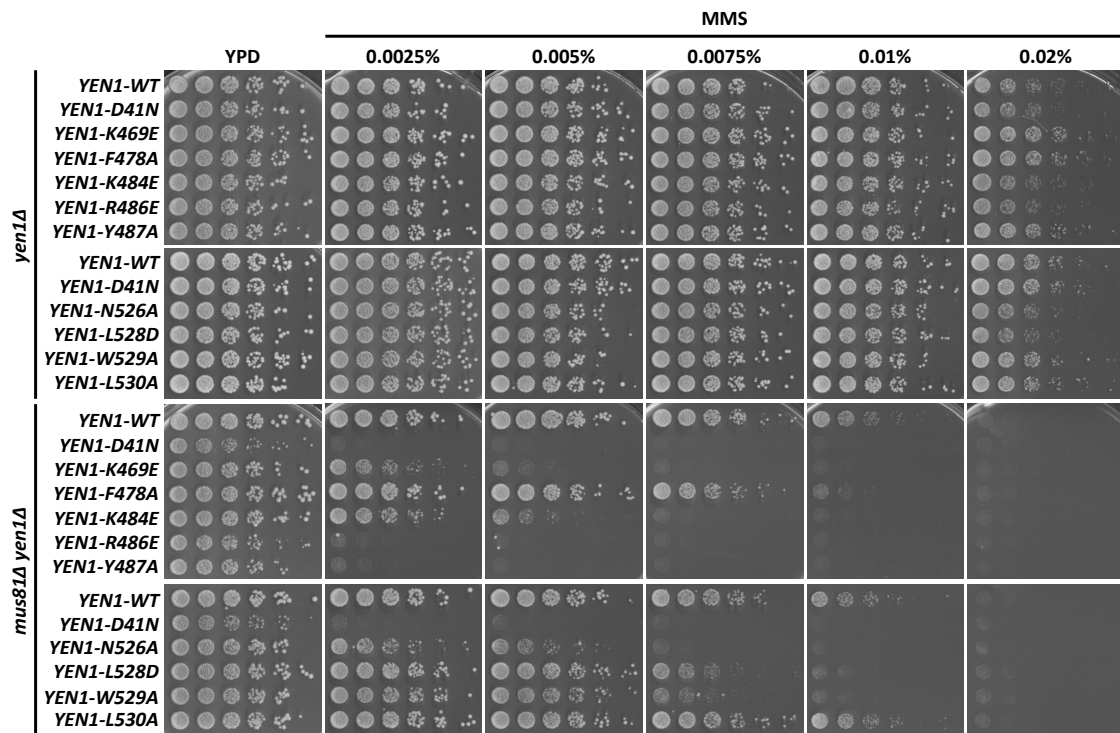

**B**

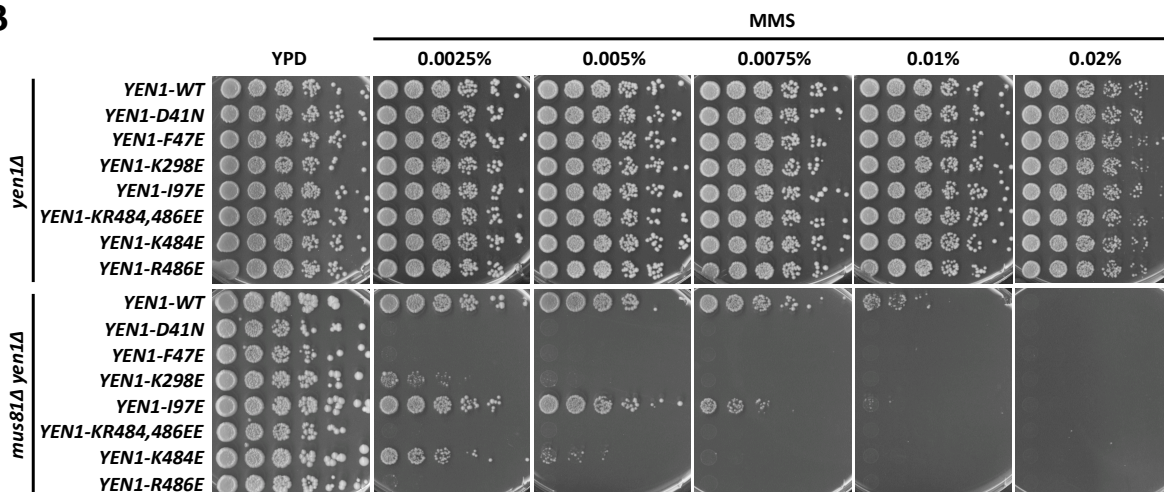

**C**

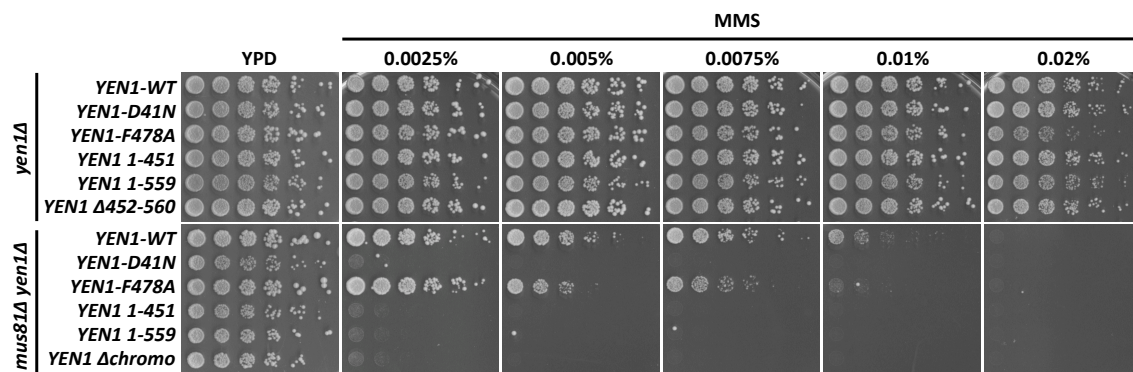

**D**

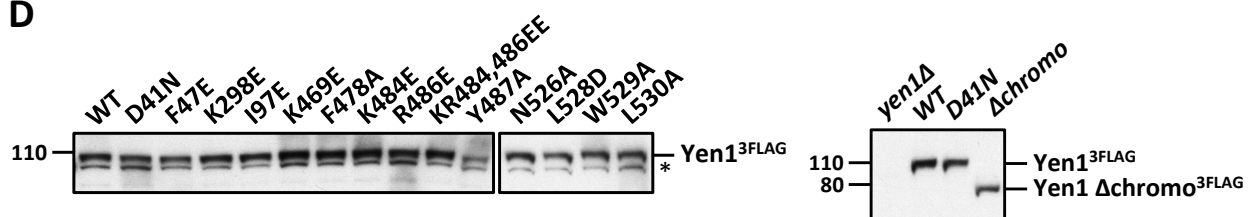

Supplement: supp [file elife-12256-supp-v1.zip]
